# Supplementary material
Source: Research Square preprint supplement (doi:10.21203/rs.3.rs-15134/v4)
Supplement: Supplementary file 1 [file e883d0846cfb05da41b89836.docx]

**No Item Guide questions/description**

| **Domain 1: Research team and reflexivity** | **Guide questions/Description** | **Explanations** |
| --- | --- | --- |
| **Personal Characteristics** |  |  |
| 1. Interviewer/facilitator | Which author/s conducted the interview or focus group? | KG and MK conducted the interviews |
| 2. Credentials | What were the researcher’s credentials? E.g. PhD, MD | KG- PhD  MK- M.Sc |
| 3. Occupation | What was their occupation at the time of the study? | KG- Research Associate  MK- Research Assistant(Qualitative) |
| 4. Gender | Was the researcher male or female? | KG-Female  MK- Female |
| 5. Experience and training | What experience or training did the researcher have? | KG- In addition to being trained in Anthropological methods, she has rich and intensive hands-on experience in using qualitative methods for last 23 years. She is well trained in data collection, transcription, translation and data analysis.  MK- In addition to being trained in Anthropological methods, she has 5 years of experience in doing data collection using qualitative methods. She has 10 years of experience in transcription. |
| **Relationship with participants** |  |  |
| 6. Relationship established | Was a relationship established prior to study commencement? | Yes |
| 7. Participant knowledge of the  interviewer | What did the participants know about the researcher? e.g. personal goals, reasons for doing the research | Participants were informed of the objectives of the research and informed consent was taken from them |
| 8. Interviewer characteristics | What characteristics were reported about the interviewer/facilitator? e.g. Bias, assumptions,  reasons and interests in the research topic | The research experience of interviewers in woman’s health is reported. |
| **Domain 2: study design** |  |  |
| **Theoretical framework** |  |  |
| 9. Methodological orientation and Theory | What methodological orientation was stated to underpin the study? e.g. grounded theory,  discourse analysis, ethnography, phenomenology, content analysis | Socio-Ecological model informs the conceptualization of the study. Grounded theory was used to analyse data. |
| **Participant selection** |  |  |
| 10. Sampling | How were participants selected? e.g. purposive, convenience, consecutive, snowball | The participants of this study were selected using purposive sampling. |
| 11. Method of approach | How were participants approached? e.g. face-to-face, telephone, mail, email | Face to face interviews were conducted |
| 12. Sample size | How many participants were in the study? | There were six participants in the study |
| 13. Non-participation | How many people refused to participate or dropped out? Reasons? | Around five staff refused to participate as they opined that it would be better to take the interview of experienced senior staff; None of the participant dropped out during the study. |
| **Setting** |  |  |
| 14. Setting of data collection | Where was the data collected? e.g. home, clinic, workplace | Hospital settings |
| 15. Presence of non-participants | Was anyone else present besides the participants and researchers? | Nobody was present except the interviewer and the interviewee during the data collection |
| 16. Description of sample | What are the important characteristics of the sample? e.g. demographic data, date | Yes, the demographic and professional background of the participants has been reported. |
| **Data collection** |  |  |
| 17. Interview guide | Were questions, prompts, guides provided by the authors? Was it pilot tested? | Yes, the study in-depth interview guides were developed by the study lead and interviewers and piloted before actual data collection. |
| 18. Repeat interviews | Were repeat interviews carried out? If yes, how many? | For one nurse participant repeat interview was conducted. |
| 19. Audio/visual recording | Did the research use audio or visual recording to collect the data? | Audio recording |
| 20. Field notes | Were field notes made during and/or after the interview or focus group? | Field notes were made during the interviews |
| 21. Duration | What was the duration of the interviews or focus group? | The interviews lasted for around 30-80 minutes |
| 22. Data saturation | Was data saturation discussed? | Yes |
| 23. Transcripts returned | Were transcripts returned to participants for comment and/or correction? | No |
| **Domain 3: analysis and findings** |  |  |
| **Data analysis** |  |  |
| 24. Number of data coders | How many data coders coded the data? | Two (KG) and (BS) |
| 25. Description of the coding tree | Did authors provide a description of the coding tree? | Yes |
| 26. Derivation of themes | Were themes identified in advance or derived from the data? | Both, a priori codes based on Socio-Ecological model and emergent codes from the data. |
| 27. Software | What software, if applicable, was used to manage the data? | NVivo 12 plus was used to manage the data |
| 28. Participant checking | Did participants provide feedback on the findings? | No |
| **Reporting** |  |  |
| 29. Quotations presented | Were participant quotations presented to illustrate the themes / findings? Was each  quotation identified? e.g. participant number | Yes, participant quotations are presented to illustrate themes/findings; Each quotation was identified with the participant ID |
| 30. Data and findings consistent | Was there consistency between the data presented and the findings? | Yes, data presented and the findings are consistent. |
|  |  |  |
| 31. Clarity of major themes | Were major themes clearly presented in the findings? | Major themes are clearly presented in the findings |
| 32. Clarity of minor themes | Is there a description of diverse cases or discussion of minor themes? | Yes, there is description of minor themes. |
